# Supplementary material
Source: Royal Society of Chemistry journal article supplement (doi:10.1039/d6cp01296e)
Supplement: d6cp01296e1.pdf [file d6cp01296e1.pdf]

## Supporting Information File

### **$\Delta$ -Machine Learning of Triplet Excitation Energies in Organic Chromophores**

Arka Pratim Ghosh, Koyal Roy, and Kalishankar Bhattacharyya\*

Department of Chemistry, IIT Guwahati, Assam-781039, India

E-mail: [ksb@iitg.ac.in](mailto:ksb@iitg.ac.in)

| <b>Sl. No.</b> | <b>Contents</b>                                                     | <b>Page No.</b> |
|----------------|---------------------------------------------------------------------|-----------------|
| 1              | Molecular structure of all 138 molecules                            | S2-S4           |
| 2              | Experimental $T_1$ energies of all 138 molecules                    | S5-S9           |
| 3              | Optimized Hyperparameters                                           | S10             |
| 4              | Five-fold cross-validation results                                  | S11             |
| 5              | List of molecules in test set that satisfied the screening criteria | S12             |
| 6              | Data and Code Availability                                          | S13             |
| 7              | Results of CAM-B3LYP and $\omega$ -B97XD methods                    | S13             |

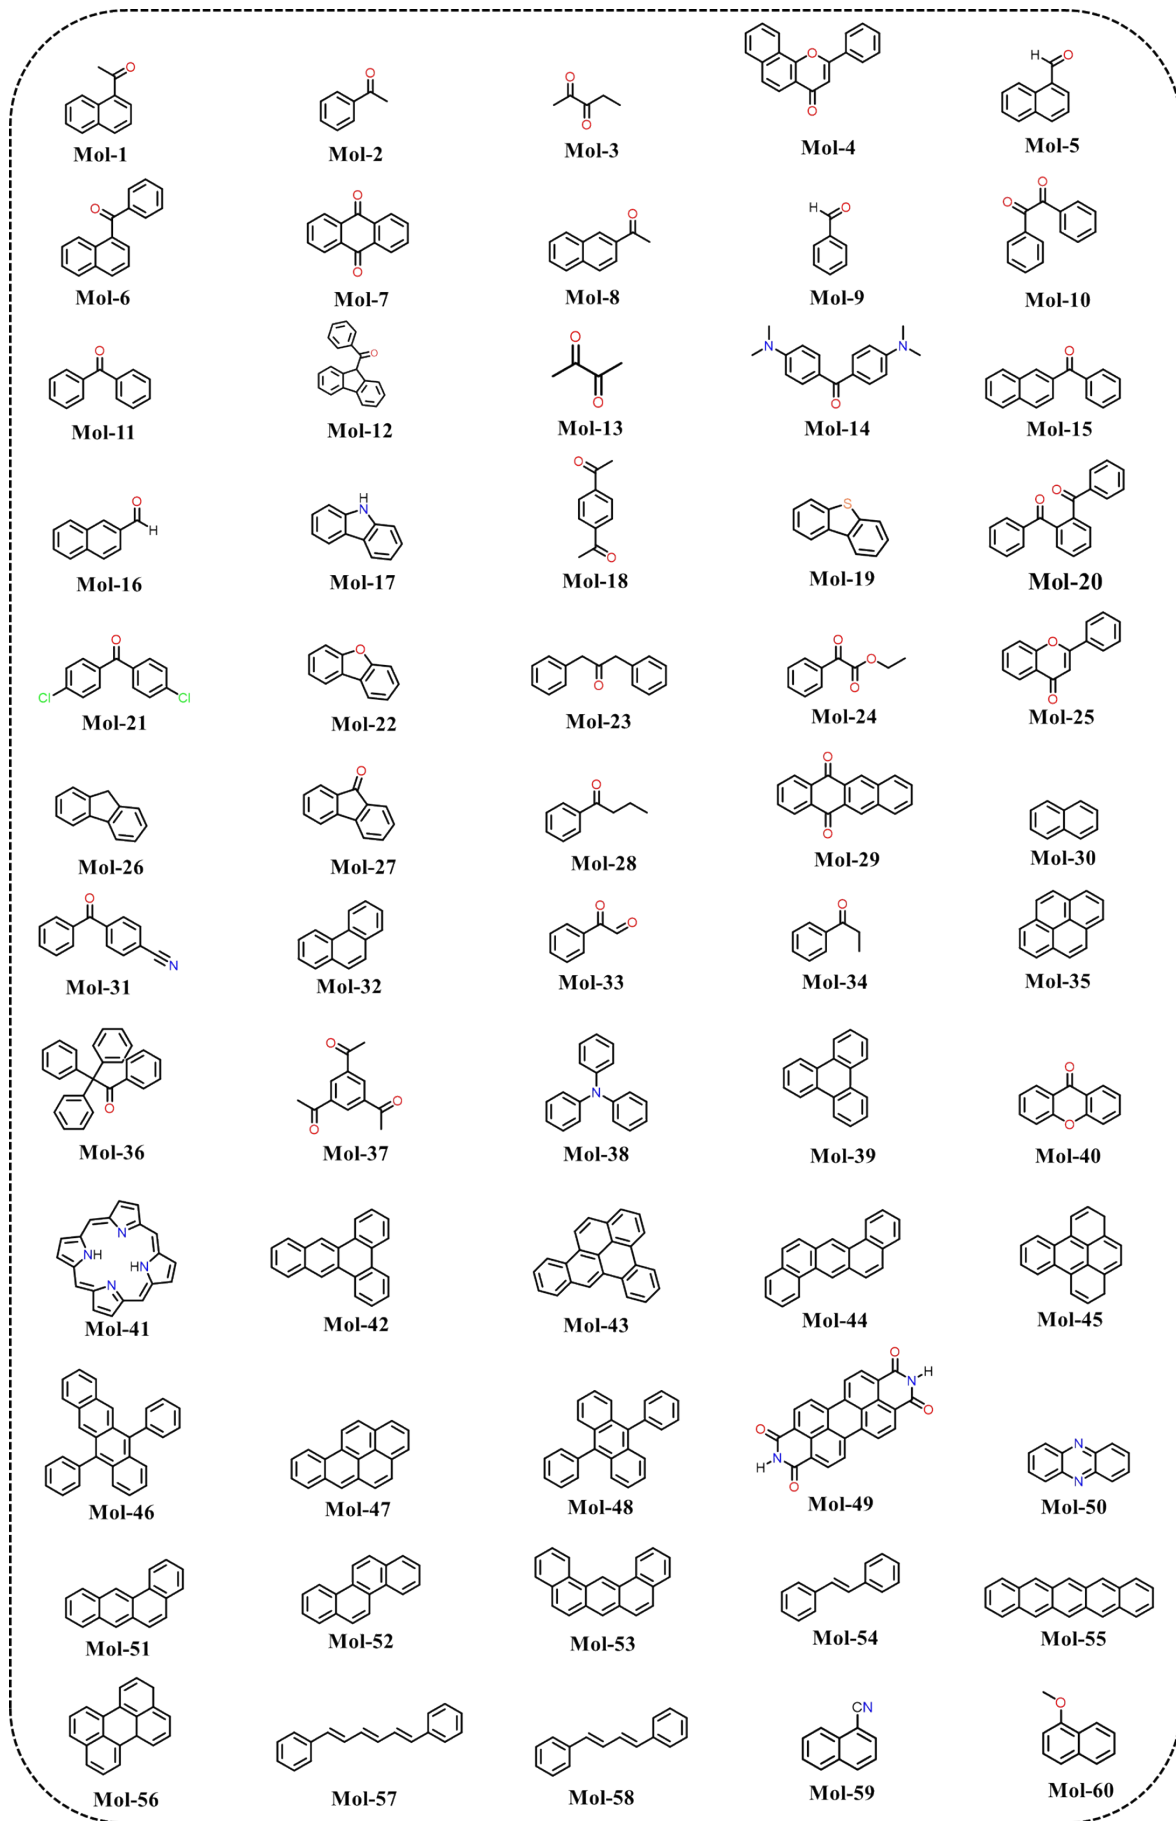

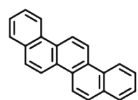

Mol-61

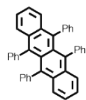

Mol-62

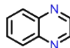

Mol-63

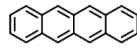

Mol-64

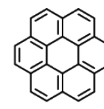

Mol-65

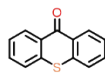

Mol-66

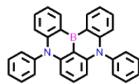

Mol-67

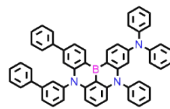

Mol-68

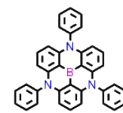

Mol-69

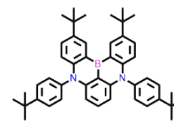

Mol-70

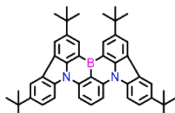

Mol-71

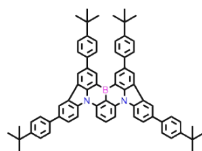

Mol-72

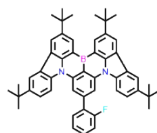

Mol-73

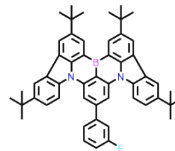

Mol-74

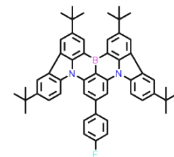

Mol-75

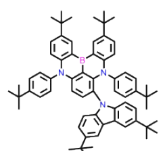

Mol-76

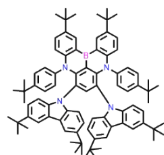

Mol-77

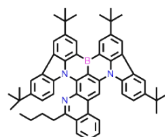

Mol-78

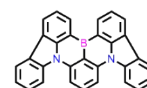

Mol-79

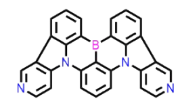

Mol-80

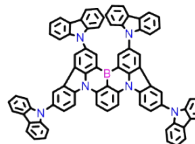

Mol-81

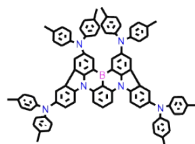

Mol-82

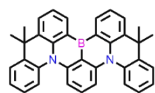

Mol-83

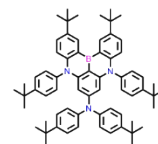

Mol-84

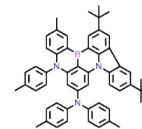

Mol-85

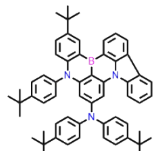

Mol-88

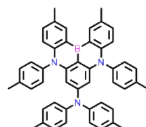

Mol-89

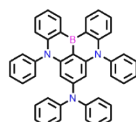

Mol-90

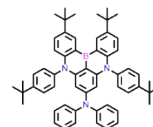

Mol-91

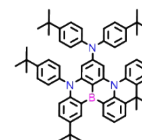

Mol-92

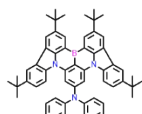

Mol-86

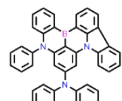

Mol-87

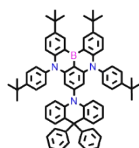

Mol-93

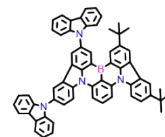

Mol-94

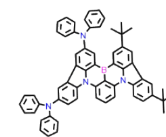

Mol-95

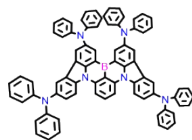

Mol-96

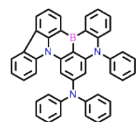

Mol-97

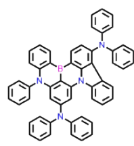

Mol-98

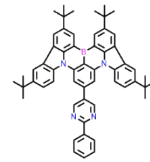

Mol-99

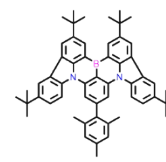

Mol-100

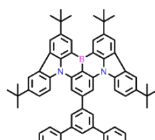

Mol-101

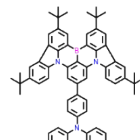

Mol-102

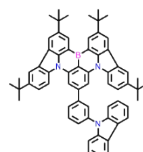

Mol-103

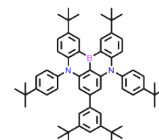

Mol-104

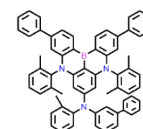

Mol-105

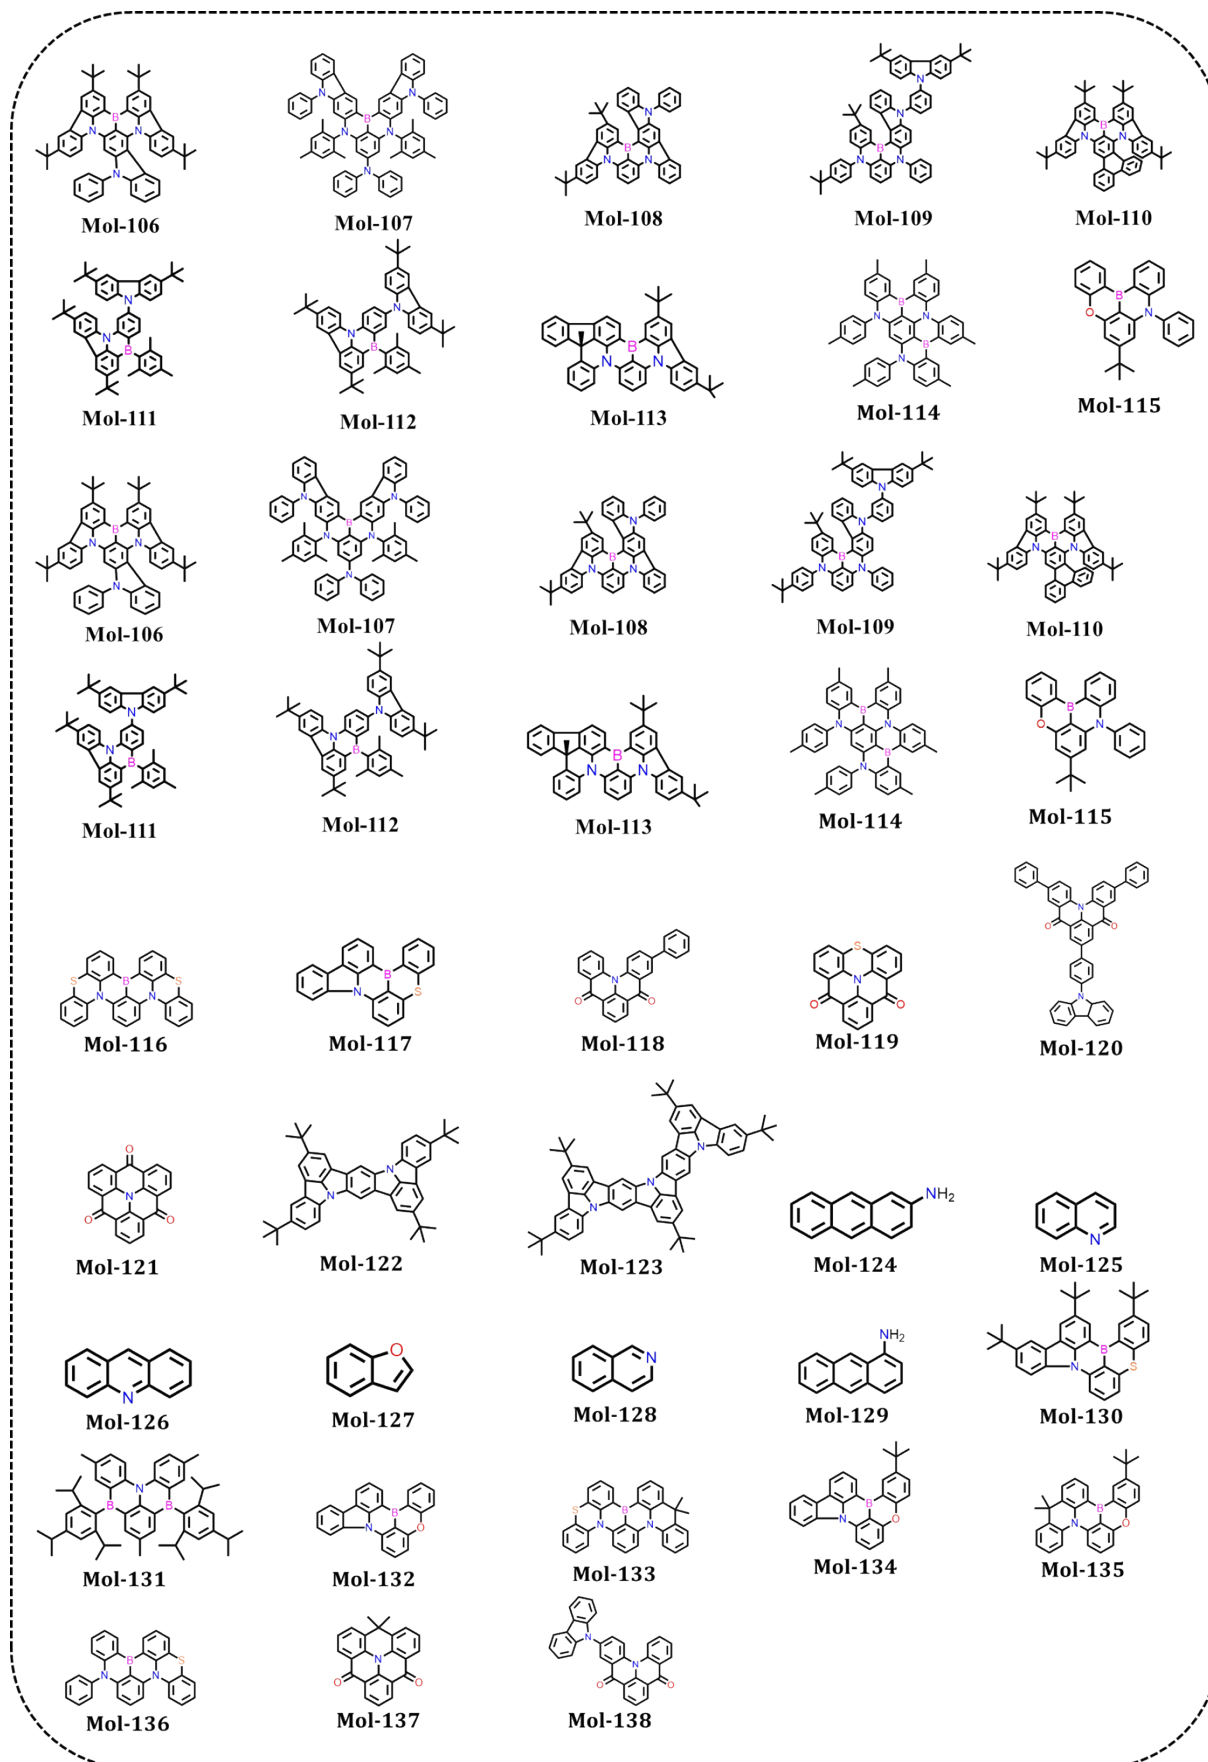

**Figure S1:** The molecular structure of all the molecules used in this study.

**Table S1:** The experimental  $T_1$  energies (eV) of all the molecules that are used in this study.

| Id     | SMILES                                                                           | Experimental $T_1$ Energy |
|--------|----------------------------------------------------------------------------------|---------------------------|
| Mol-1  | <chem>c1cc2c(cc1)cccc2C(=O)C</chem>                                              | 2.45                      |
| Mol-2  | <chem>c1c(cccc1)C(=O)C</chem>                                                    | 3.19                      |
| Mol-3  | <chem>C(=O)(C(=O)CC)C</chem>                                                     | 2.37                      |
| Mol-4  | <chem>c1(=O)cc(oc2c1ccc1c2cccc1)c1ccccc1</chem>                                  | 2.70                      |
| Mol-5  | <chem>c1cc2c(cc1)cccc2C=O</chem>                                                 | 2.44                      |
| Mol-6  | <chem>c1cc2c(cc1)cccc2C(=O)c1ccccc1</chem>                                       | 2.49                      |
| Mol-7  | <chem>c1cc2c(cc1)C(=O)c1c(cccc1)C2=O</chem>                                      | 2.71                      |
| Mol-8  | <chem>c1cc2c(cc1)ccc(c2)C(=O)C</chem>                                            | 2.57                      |
| Mol-9  | <chem>c1c(cccc1)C=O</chem>                                                       | 3.12                      |
| Mol-10 | <chem>c1c(cccc1)C(=O)C(=O)c1ccccc1</chem>                                        | 2.33                      |
| Mol-11 | <chem>c1ccc(cc1)C(=O)c1ccccc1</chem>                                             | 2.68                      |
| Mol-12 | <chem>c1ccc2c(-c3c(C2C(=O)c2ccccc2)cccc3)c1</chem>                               | 2.90                      |
| Mol-13 | <chem>C(=O)(C(=O)C)C</chem>                                                      | 2.38                      |
| Mol-14 | <chem>c1cc(ccc1N(C)C)C(=O)c1ccc(cc1)N(C)C</chem>                                 | 2.65                      |
| Mol-15 | <chem>c1cc2c(cc1)ccc(c2)C(=O)c1ccccc1</chem>                                     | 2.58                      |
| Mol-16 | <chem>c1cc2c(cc1)ccc(c2)C=O</chem>                                               | 2.58                      |
| Mol-17 | <chem>c1ccc2c(c1)c1c(cccc1)[nH]2</chem>                                          | 3.04                      |
| Mol-18 | <chem>c1(ccc(cc1)C(=O)C)C(=O)C</chem>                                            | 2.94                      |
| Mol-19 | <chem>c1ccc2c(c1)c1c(cccc1)s2</chem>                                             | 3.02                      |
| Mol-20 | <chem>c1(c(cccc1)C(=O)c1ccccc1)C(=O)c1ccccc1</chem>                              | 3.02                      |
| Mol-21 | <chem>c1(ccc(cc1)C(=O)c1ccc(cc1)Cl)Cl</chem>                                     | 2.95                      |
| Mol-22 | <chem>c1ccc2c(c1)c1c(cccc1)o2</chem>                                             | 3.04                      |
| Mol-23 | <chem>c1c(cccc1)CC(=O)Cc1ccccc1</chem>                                           | 3.13                      |
| Mol-24 | <chem>CCOC(=O)C(=O)c1ccccc1</chem>                                               | 2.68                      |
| Mol-25 | <chem>c1c2c(ccc1)oc(cc2=O)c1ccccc1</chem>                                        | 2.69                      |
| Mol-26 | <chem>c1ccc2c(-c3c(C2)cccc3)c1</chem>                                            | 2.93                      |
| Mol-27 | <chem>c1cc2-c3c(cccc3)C(=O)c2cc1</chem>                                          | 2.31                      |
| Mol-28 | <chem>c1cc(ccc1)C(=O)CCC</chem>                                                  | 3.17                      |
| Mol-29 | <chem>c12cc3c(cc1C(=O)c1ccccc1C2=O)cccc3</chem>                                  | 2.42                      |
| Mol-30 | <chem>c1cc2c(cc1)cccc2</chem>                                                    | 2.64                      |
| Mol-31 | <chem>c1ccc(cc1)C(=O)c1ccc(cc1)C#N</chem>                                        | 2.88                      |
| Mol-32 | <chem>c1cc2c(cc1)c1c(cc2)cccc1</chem>                                            | 2.70                      |
| Mol-33 | <chem>c1c(cccc1)C(=O)C=O</chem>                                                  | 2.71                      |
| Mol-34 | <chem>c1cc(ccc1)C(=O)CC</chem>                                                   | 3.24                      |
| Mol-35 | <chem>c1cc2c3c(c1)ccc1c3c(cc2)ccc1</chem>                                        | 2.11                      |
| Mol-36 | <chem>C(=O)(C(c1ccccc1)(c1ccccc1)c1ccccc1)c1ccccc1</chem>                        | 3.18                      |
| Mol-37 | <chem>c1c(cc(cc1C(=O)C)C(=O)C)C(=O)C</chem>                                      | 3.04                      |
| Mol-38 | <chem>N(c1ccccc1)(c1ccccc1)c1ccccc1</chem>                                       | 2.89                      |
| Mol-39 | <chem>c1cc2c(cc1)c1c(c3c2cccc3)cccc1</chem>                                      | 3.07                      |
| Mol-40 | <chem>c1cc2c(cc1)c(=O)c1c(cccc1)o2</chem>                                        | 3.22                      |
| Mol-41 | <chem>c\1/2=C\C3=N/C(=C\c4ccc(/C=C\5/N=C(/C=c(/cc1)[nH]2)C=C5)[nH]4)/C=C3</chem> | 1.57                      |

|        |                                                                                                                                                                                                |      |
|--------|------------------------------------------------------------------------------------------------------------------------------------------------------------------------------------------------|------|
| Mol-42 | <chem>c1cc2c(cc1)cc1c(c2)c2c(c3c1cccc3)cccc2</chem>                                                                                                                                            | 2.20 |
| Mol-43 | <chem>c12cc3c4c(c1cccc2)ccc1c4c(c2c3cccc2)ccc1</chem>                                                                                                                                          | 2.03 |
| Mol-44 | <chem>c12c(cc3c(c1)c1c(cc3)cccc1)c1c(cccc1)cc2</chem>                                                                                                                                          | 2.26 |
| Mol-45 | <chem>c1cc2c3c(c1)ccc1c3c(c3c2cccc3)ccc1</chem>                                                                                                                                                | 2.29 |
| Mol-46 | <chem>c12cc3c(cc1cccc2)c(c1c(c3c2cccc2)cccc1)c1cccc1</chem>                                                                                                                                    | 1.20 |
| Mol-47 | <chem>c12cc3c4c(c1cccc2)ccc1c4c(cc3)ccc1</chem>                                                                                                                                                | 1.82 |
| Mol-48 | <chem>c1cc2c(cc1)c(c1c(c2c2cccc2)cccc1)c1cccc1</chem>                                                                                                                                          | 1.77 |
| Mol-49 | <chem>c1c2c3c4c(c1)c1ccc5c6c1c(c4ccc3C(=O)NC2=O)ccc6C(=O)NC5=O</chem>                                                                                                                          | 1.20 |
| Mol-50 | <chem>c1cc2c(cc1)nc1c(cccc1)n2</chem>                                                                                                                                                          | 1.93 |
| Mol-51 | <chem>c1cc2c(cc1)cc1c(c2)ccc2c1cccc2</chem>                                                                                                                                                    | 2.05 |
| Mol-52 | <chem>c12c(ccc3c1cccc3)c1c(cccc1)cc2</chem>                                                                                                                                                    | 2.49 |
| Mol-53 | <chem>c1cc2c(c3c1cccc3)cc1c(c2)ccc2c1cccc2</chem>                                                                                                                                              | 2.29 |
| Mol-54 | <chem>c1ccc(cc1)/C=C/c1cccc1</chem>                                                                                                                                                            | 2.14 |
| Mol-55 | <chem>c12cc3c(cc1cccc2)cc1c(c3)cc2c(c1)cccc2</chem>                                                                                                                                            | 0.86 |
| Mol-56 | <chem>c1cc2c3c(c1)c1cccc4c1c(c3ccc2)ccc4</chem>                                                                                                                                                | 1.53 |
| Mol-57 | <chem>c1ccc(cc1)/C=C/C=C/C=C/c1cccc1</chem>                                                                                                                                                    | 1.54 |
| Mol-58 | <chem>c1ccc(cc1)/C=C/C=C/C/c1cccc1</chem>                                                                                                                                                      | 1.83 |
| Mol-59 | <chem>c1cc2c(cc1)cccc2C#N</chem>                                                                                                                                                               | 2.49 |
| Mol-60 | <chem>c1cc2c(cc1)cccc2OC</chem>                                                                                                                                                                | 2.59 |
| Mol-61 | <chem>c12c(ccc3c1ccc1c3cccc1)c1c(cccc1)cc2</chem>                                                                                                                                              | 2.49 |
| Mol-62 | <chem>c12c(c3c(c(c1cccc2)c1cccc1)c(c1c(c3c2cccc2)cccc1)c1cccc1)c1cccc1</chem>                                                                                                                  | 1.14 |
| Mol-63 | <chem>c1cc2c(cc1)ncn2</chem>                                                                                                                                                                   | 2.64 |
| Mol-64 | <chem>c12cc3c(cc1cccc2)cc1c(c3)cccc1</chem>                                                                                                                                                    | 1.27 |
| Mol-65 | <chem>c1c2c3c4c(c1)ccc1c4c4e5c3c(cc2)ccc5ccc4cc1</chem>                                                                                                                                        | 2.40 |
| Mol-66 | <chem>c1cc2c(cc1)c(=O)c1c(cccc1)s2</chem>                                                                                                                                                      | 2.84 |
| Mol-67 | <chem>b12c3cccc3n(c3c2c(ccc3)n(c2c1cccc2)c1cccc1)c1cccc1</chem>                                                                                                                                | 2.49 |
| Mol-68 | <chem>b12c3ccc(cc3n(c3c2c(ccc3)n(c2c1ccc(c2)N(c1cccc1)c1cccc1)c1cccc1)c1ccc(cc1)c1cccc1)c1cccc1</chem>                                                                                         | 2.47 |
| Mol-69 | <chem>b12c3c4cccc3n(c3c2c(ccc3)n(c2c1c(ccc2)n4c1cccc1)c1cccc1)c1cccc1</chem>                                                                                                                   | 2.97 |
| Mol-70 | <chem>b12c3ccc(ccc3n(c3c2c(ccc3)n(c2c1cc(cc2)C(C)(C)C)c1ccc(cc1)C(C)(C)C)c1ccc(cc1)C(C)(C)C(C)(C)C(C)(C)C</chem>                                                                               | 2.63 |
| Mol-71 | <chem>b12c3ccc(cc4c3n(c3c2c(ccc3)n2c3c1cc(cc3c1c2ccc(c1)C(C)(C)C)C(C)(C)C)c1c4cc(cc1)C(C)(C)C(C)(C)C</chem>                                                                                    | 2.53 |
| Mol-72 | <chem>b12c3ccc(cc4c3n(c3c2c(ccc3)n2c3c1cc(cc3c1c2ccc(c1)c1ccc(cc1)C(C)(C)C)c1ccc(cc1)C(C)(C)C)c1c4cc(cc1)c1ccc(cc1)C(C)(C)C)c1ccc(cc1)C(C)(C)C</chem>                                          | 2.50 |
| Mol-73 | <chem>b12c3ccc(cc4c3n(c3c2c(cc(c3)e2c(cccc2)F)n2c3c1cc(cc3c1c2ccc(c1)C(C)(C)C)C(C)(C)C)c1c4cc(cc1)C(C)(C)C(C)(C)C</chem>                                                                       | 2.35 |
| Mol-74 | <chem>b12c3ccc(cc4c3n(c3c2c(cc(c3)e2cccc(c2)F)n2c3c1cc(cc3c1c2ccc(c1)C(C)(C)C)C(C)(C)C)c1c4cc(cc1)C(C)(C)C(C)(C)C</chem>                                                                       | 2.40 |
| Mol-75 | <chem>b12c3ccc(cc4c3n(c3c2c(cc(c3)e2ccc(cc2)F)n2c3c1cc(cc3c1c2ccc(c1)C(C)(C)C)C(C)(C)C)c1c4cc(cc1)C(C)(C)C(C)(C)C</chem>                                                                       | 2.39 |
| Mol-76 | <chem>c12c3c(ccc1n1c4c(e5c1ccc(c5)C(C)(C)C)cc(cc4)C(C)(C)C)n1c4ccc(cc4c4c1c(b3c1c3n2c2c(e3cc(c1)C(C)(C)C)cc(cc2)C(C)(C)C)cc(e4)C(C)(C)C(C)(C)C</chem>                                          | 2.42 |
| Mol-77 | <chem>c12c3c(c(cc1n1c4c(e5c1ccc(c5)C(C)(C)C)cc(cc4)C(C)(C)C)n1c4ccc(cc4c4c1ccc(c4)C(C)(C)C)C(C)(C)C)n1c4ccc(cc4c4c1c(b3c1c3n2c2c(e3cc(c1)C(C)(C)C)cc(cc2)C(C)(C)C)cc(e4)C(C)(C)C(C)(C)C</chem> | 2.27 |
| Mol-78 | <chem>c12c3c(c4c(c1)c1c(c(n4)CCCC)cccc1)n1c4ccc(cc4c4c1c(b3c1c3n2c2c(c3c</chem>                                                                                                                | 2.19 |

|         |                                                                                                                                                                                   |      |
|---------|-----------------------------------------------------------------------------------------------------------------------------------------------------------------------------------|------|
|         | <chem>c(c1)C(C)(C)C)cc(cc2)C(C)(C)C)cc(c4)C(C)(C)C)C(C)(C)C</chem>                                                                                                                |      |
| Mol-79  | <chem>b12c3cccc4c3n(c3c2c(ccc3)n2c3c1cccc3c1c2cccc1)c1c4cccc1</chem>                                                                                                              | 2.47 |
| Mol-80  | <chem>b12c3cccc4c3n(c3c2c(ccc3)n2c3c1cccc3c1c2ccnc1)c1c4encc1</chem>                                                                                                              | 2.58 |
| Mol-81  | <chem>b12c3cc(cc4c3n(c3c2c(ccc3)n2c3c1cc(cc3c1c2ccc(c1)n1c2cccc2c2c1cccc2)n1c2c(cccc2)c2c1cccc2)c1c4cc(cc1)n1c2cccc2c2c1cccc2)n1c2c(cccc2)c2c1cccc2</chem>                        | 2.33 |
| Mol-82  | <chem>b12c3cc(cc4c3n(c3c2c(ccc3)n2c3c1cc(cc3c1c2ccc(c1)N(c1ccc(cc1)C)c1cc(c(cc1)C)N(c1ccc(cc1)C)c1ccc(cc1)C)c1c4cc(cc1)N(c1ccc(cc1)C)c1ccc(cc1)C)N(c1ccc(cc1)C)c1ccc(cc1)C</chem> | 2.03 |
| Mol-83  | <chem>b12c3c(cccc3n3-c4cccc4C(c4c3c2ccc4)(C)C)n2-c3cccc3C(c3c2c1ccc3)(C)C</chem>                                                                                                  | 2.40 |
| Mol-84  | <chem>b12c3cc(ccc3n(c3c2c(cc(c3)N(c2ccc(cc2)C(C)(C)C)c2ccc(cc2)C(C)(C)C)n(c2c1cc(cc2)C(C)(C)C)c1ccc(cc1)C(C)(C)C)c1ccc(cc1)C(C)(C)C)C(C)(C)C</chem>                               | 2.57 |
| Mol-85  | <chem>b12c3cc(ccc3n(c3c2c(cc(c3)N(c2ccc(cc2)C)c2ccc(cc2)C)n2c3c1cc(cc3c1c2ccc(c1)C(C)(C)C)C(C)(C)C)c1ccc(cc1)C)C</chem>                                                           | 2.47 |
| Mol-86  | <chem>b12c3cc(cc4c3n(c3c2c(cc(c3)N(c2ccc(cc2)C)c2ccc(cc2)C)n2c3c1cc(cc3c1c2ccc(c1)C(C)(C)C)C(C)(C)C)c1c4cc(cc1)C(C)(C)C)C(C)(C)C</chem>                                           | 2.45 |
| Mol-87  | <chem>b12c3cccc3n(c3c2c(cc(c3)N(c2cccc2)c2cccc2)n2c3c1cccc3c1c2cccc1)c1cccc1</chem>                                                                                               | 2.51 |
| Mol-88  | <chem>b12c3cc(ccc3n(c3c2c(cc(c3)N(c2ccc(cc2)C(C)(C)C)c2ccc(cc2)C(C)(C)C)n2c3c1cccc3c1c2cccc1)c1ccc(cc1)C(C)(C)C)C(C)(C)C</chem>                                                   | 2.49 |
| Mol-89  | <chem>b12c3cc(ccc3n(c3c2c(cc(c3)N(c2ccc(cc2)C)c2ccc(cc2)C)n(c2c1cc(cc2)C)c1ccc(cc1)C)c1ccc(cc1)C)C</chem>                                                                         | 2.53 |
| Mol-90  | <chem>b12c3cccc3n(c3c2c(cc(c3)N(c2cccc2)c2cccc2)n(c2c1cccc2)c1cccc1)c1cccc1</chem>                                                                                                | 2.71 |
| Mol-91  | <chem>b12c3cc(ccc3n(c3c2c(cc(c3)N(c2cccc2)c2cccc2)n(c2c1cc(cc2)C(C)(C)C)c1ccc(cc1)C(C)(C)C)c1ccc(cc1)C(C)(C)C)C(C)(C)C</chem>                                                     | 2.68 |
| Mol-92  | <chem>b12c3c(cccc3)n(c3c1c(ccc3N(c1ccc(cc1)C(C)(C)C)c1ccc(cc1)C(C)(C)C)n1-c3c(cccc3)C(c3c1c2ccc3)(C)C)c1ccc(cc1)C(C)(C)C</chem>                                                   | 2.53 |
| Mol-93  | <chem>b12c3cc(ccc3n(c3c2c(cc(c3)N2c3cccc3C(c3c2cccc3)(c2cccc2)c2cccc2)n(c2c1cc(cc2)C(C)(C)C)c1ccc(cc1)C(C)(C)C)c1ccc(cc1)C(C)(C)C)C(C)(C)C</chem>                                 | 2.56 |
| Mol-94  | <chem>b12c3cc(cc4c3n(c3c2c(ccc3)n2c3c1cc(cc3c1c2ccc(c1)n1c2cccc2c2c1cccc2)n1c2cccc2c2c1cccc2)c1c4cc(cc1)C(C)(C)C)C(C)(C)C</chem>                                                  | 2.39 |
| Mol-95  | <chem>b12c3cc(cc4c3n(c3c2c(ccc3)n2c3c1cc(cc3c1c2ccc(c1)N(c1cccc1)c1cccc1)N(c1cccc1)c1cccc1)c1c4cc(cc1)C(C)(C)C)C(C)(C)C</chem>                                                    | 2.19 |
| Mol-96  | <chem>b12c3cc(cc4c3n(c3c2c(ccc3)n2c3c1cc(cc3c1c2ccc(c1)N(c1cccc1)c1cccc1)N(c1cccc1)c1cccc1)c1c4cc(cc1)N(c1cccc1)c1cccc1)N(c1cccc1)c1cccc1</chem>                                  | 2.14 |
| Mol-97  | <chem>c1ccc(cc1)N(c1cc2n(c3cccc3)c3cccc3b3c2c(c1)n1c2cccc2c2c1c3ccc2)c1cccc1</chem>                                                                                               | 2.59 |
| Mol-98  | <chem>c1ccc(cc1)N(c1cc2n(c3cccc3)c3cccc3b3c2c(c1)n1c2cccc2c2c1c3ccc2N(c1cccc1)c1cccc1)c1cccc1</chem>                                                                              | 2.54 |
| Mol-99  | <chem>CC(c1ccc2c(c1)c1cc(cc3c1n2c1cc(cc2c1b3c1cc(cc3c1n2c1ccc(cc31)C(C)(C)C)C(C)(C)C)c1cnc(nc1)c1cccc1)C(C)(C)C)C(C)C</chem>                                                      | 2.32 |
| Mol-100 | <chem>Cc1cc(C)c(c(c1)C)c1cc2c3c(c1)n1c4ccc(cc4c4c1c(b3c1c3n2c2ccc(cc2c3cc(c1)C(C)(C)C)C(C)(C)C)cc(c4)C(C)(C)C)C(C)(C)C</chem>                                                     | 2.50 |
| Mol-101 | <chem>CC(c1ccc2c(c1)c1cc(cc3c1n2c1cc(cc2c1b3c1cc(cc3c1n2c1ccc(cc31)C(C)(C)C)C(C)(C)C)c1cc(cc(c1)c1cccc1)c1cccc1)C(C)(C)C)C(C)C</chem>                                             | 2.50 |
| Mol-102 | <chem>CC(c1ccc2c(c1)c1cc(cc3c1n2c1cc(cc2c1b3c1cc(cc3c1n2c1ccc(cc31)C(C)(C)C)C(C)(C)C)c1ccc(cc1)n1c2cccc2c2c1cccc2)C(C)(C)C)C(C)C</chem>                                           | 2.47 |
| Mol-103 | <chem>CC(c1ccc2c(c1)c1cc(cc3c1n2c1cc(cc2c1b3c1cc(cc3c1n2c1ccc(cc31)C(C)(C)C)C(C)(C)C)C(C)(C)C)C(C)(C)C</chem>                                                                     | 2.42 |

|         |                                                                                                                                            |      |
|---------|--------------------------------------------------------------------------------------------------------------------------------------------|------|
|         | C)C)C(C)(C)C)c1cccc(c1)n1c2ccccc2e2e1cccc2)C(C)(C)C)C(C)C                                                                                  |      |
| Mol-104 | b12c3cc(ccc3n(c3c2c(cc(e3)c2cc(cc(e2)C(C)(C)C)C(C)(C)C)n(c2e1cc(cc2)C(C)(C)C)c1ccc(cc1)C(C)(C)C)c1ccc(cc1)C(C)(C)C)C(C)(C)C                | 2.58 |
| Mol-105 | Cc1cccc1N(c1cc2c3c(e1)n(c1c(C)cccc1C)c1c(b3c3c(n2c2c(C)cccc2C)cc(cc3)e2cccc2)ccc(e1)c1cccc1)c1cccc(c1)c1cccc1                              | 2.56 |
| Mol-106 | CC(c1ccc2c(e1)c1cc(cc3e1n2e1cc2c(e4e1b3e1cc(cc3e1n4e1ccc(cc31)C(C)(C)C)C(C)(C)C)c1c(n2c2cccc2)cccc1)C(C)(C)C)C(C)C                         | 2.39 |
| Mol-107 | Cc1cc(C)c(c(e1)C)n1c2cc3n(c4cccc4)c4c(c3cc2b2c3c1cc(cc3n(c1c2cc2c3cccc3n(c2c1)c1cccc1)c1c(C)cc(cc1C)C)N(c1cccc1)c1cccc1)cccc4              | 2.59 |
| Mol-108 | CC(c1cc2b3c4e5c(cc6c4n(c4c3c(n3c2c(e1)c1cc(ccc31)C(C)(C)C)ccc4)c1c6cccc1)n(c1c5cccc1)c1cccc1)C(C)C                                         | 2.16 |
| Mol-109 | CC(c1cc2b3c4e5c(cc6c4n(c4c3c(n3c2c(e1)c1cc(ccc31)C(C)(C)C)ccc4)c1c6cccc1)n(c1c5cccc1)c1cccc(c1)n1c2ccc(cc2e2c1ccc(e2)C(C)(C)C)C(C)(C)C(C)C | 2.20 |
| Mol-110 | CC(c1cc2c3cc(ccc3n3e2c(e1)b1e2c3cc3c(e2n2e4c1cc(cc4e1c2ccc(e1)C(C)(C)C)C(C)(C)C)c1cccc1c1c3cccc1)C(C)(C)C)C(C)C                            | 2.33 |
| Mol-111 | Cc1cc(C)c(c(e1)C)b1c2ccc(cc2n2c3e1cc(cc3e1c2ccc(e1)C(C)(C)C)C(C)(C)C)n1c2ccc(cc2c2c1ccc(e2)C(C)(C)C)C(C)(C)C                               | 2.60 |
| Mol-112 | Cc1cc(C)c(c(e1)C)b1e2cc(ccc2n2c3e1cc(cc3e1c2ccc(e1)C(C)(C)C)C(C)(C)C)n1c2ccc(cc2c2c1ccc(e2)C(C)(C)C)C(C)(C)C                               | 2.52 |
| Mol-113 | CC(c1cc2b3c4c(cccc4n4e2c(e1)c1cc(ccc41)C(C)(C)C)n1-c2cccc2[C@]2(c4e1c3ccc4-e1c2cccc1)C(C)C                                                 | 2.45 |
| Mol-114 | b12c3c(ccc(e3)C)n(c3c2c2c4c(c3)n(c3ccc(cc3)C)c3ccc(cc3b4c3c(n2c2c1cc(cc2)C)ccc(e3)C)C)c1ccc(cc1)C                                          | 2.54 |
| Mol-115 | b12c3cccc3oc3e2c(cc(e3)C(C)(C)C)n(c2e1cccc2)c1cccc1                                                                                        | 2.77 |
| Mol-116 | b12c3cccc4c3n(-c3cccc3S4)c3c2c(ccc3)n2-c3c(cccc3)Sc3c2c1ccc3                                                                               | 2.44 |
| Mol-117 | b12c3cccc4c3n(c3e1c(ccc3)sc1c2cccc1)c1c4cccc1                                                                                              | 2.52 |
| Mol-118 | n12c3c(cccc3)c(=O)c3c2c(ccc3)c(=O)c2c1ccc(e2)c1cccc1                                                                                       | 2.42 |
| Mol-119 | n12c3c4cccc3Sc3c1c(ccc3)c(=O)c1c2c(ccc1)c4=O                                                                                               | 2.07 |
| Mol-120 | n12c3c(cc(cc3)c3cccc3)c(=O)c3c2c(cc(e3)c2ccc(cc2)n2c3cccc3c3e2cccc3)c(=O)c2c1ccc(e2)c1cccc1                                                | 2.38 |
| Mol-121 | n12c3c4cccc3c(=O)c3c1c(ccc3)c(=O)c1c2c(ccc1)c4=O                                                                                           | 2.68 |
| Mol-122 | c12cc3c(cc1c1cc(cc4e1n2e1c4cc(cc1)C(C)(C)C)C(C)(C)C)n1e2c3cc(cc2c2c1ccc(e2)C(C)(C)C)C(C)(C)C                                               | 2.55 |
| Mol-123 | c12cc3c(cc1c1cc(cc4e1n2e1c4cc(cc1)C(C)(C)C)C(C)(C)C)n1e2c3cc(cc2c2c1cc1c(e2)n2c3e1cc(cc3e1c2ccc(e1)C(C)(C)C)C(C)(C)C)C(C)(C)C              | 2.49 |
| Mol-124 | c1cc2c(cc1)cc1c(e2)cc(cc1)N                                                                                                                | 1.86 |
| Mol-125 | c1cc2c(cc1)ccn2                                                                                                                            | 2.68 |
| Mol-126 | c1cc2c(cc1)cc1c(ccc1)n2                                                                                                                    | 1.95 |
| Mol-127 | c12c(ccc1)occ2                                                                                                                             | 3.05 |
| Mol-128 | c1cc2c(cc1)cncc2                                                                                                                           | 2.63 |
| Mol-129 | c1cc2c(cc1)cc1c(e2)c(ccc1)N                                                                                                                | 1.86 |
| Mol-130 | b12c3cc(cc4c3n(c3e1c(ccc3)sc1c2cc(cc1)C(C)(C)C)c1c4cc(cc1)C(C)(C)C)C(C)(C)C                                                                | 2.58 |
| Mol-131 | n12c3c(cc(cc3b(c3e1ccc(e3)C)c1c(cc(cc1C(C)C)C(C)C)C(C)C)C)C)b(c1c2cc(c1)C)c1c(cc(cc1C(C)C)C(C)C)C(C)C                                      | 2.41 |
| Mol-132 | b12c3cccc4c3n(c3e1c(ccc3)oc1c2cccc1)c1c4cccc1                                                                                              | 2.63 |
| Mol-133 | b12c3cccc4c3n(-c3c(cccc3)S4)c3c1c(ccc3)n1-c3c(cccc3)C(c3e1c2ccc3)C(C)C                                                                     | 2.31 |
| Mol-134 | b12c3cc(ccc3oc3e2c(ccc3)n2c3e1cccc3e1c2cccc1)C(C)(C)C                                                                                      | 2.76 |
| Mol-135 | b12c3cc(ccc3oc3e2c(ccc3)n2-c3c(cccc3)C(c3e2c1ccc3)C(C)C)C(C)(C)C                                                                           | 2.66 |

|         |                                                                              |      |
|---------|------------------------------------------------------------------------------|------|
| Mol-136 | <chem>b12c3cccc4c3n(-c3cccc3S4)c3c2c(ccc3)n(c2c1cccc2)c1cccc1</chem>         | 2.51 |
| Mol-137 | <chem>n12c3c4cccc3C(c3c1c(ccc3)c(=O)c1c2c(ccc1)c4=O)(C)C</chem>              | 2.47 |
| Mol-138 | <chem>n12c3c(cccc3)c(=O)c3c2c(ccc3)c(=O)c2c1ccc(c2)n1c2cccc2c2c1cccc2</chem> | 2.58 |

## OPTIMIZED HYPERPARAMETERS

**Table S2:** Optimized hyperparameters of the Chemprop model for TDDFT method.

| Hyperparameter     | Value |
|--------------------|-------|
| depth              | 6     |
| message-hidden-dim | 700   |
| ffn-hidden-dim     | 1200  |
| ffn-num-layers     | 2     |
| dropout            | 0.1   |
| epochs             | 100   |

**Table S3:** Optimized hyperparameters of the Chemprop model for  $\Delta$ SCF method.

| Hyperparameter     | Value |
|--------------------|-------|
| depth              | 4     |
| message-hidden-dim | 1200  |
| ffn-hidden-dim     | 1500  |
| ffn-num-layers     | 2     |
| dropout            | 0.0   |
| epochs             | 100   |

**Table S4:** Optimized hyperparameters of the Chemprop model for xTB/sTDA method.

| Hyperparameter     | Value |
|--------------------|-------|
| depth              | 5     |
| message-hidden-dim | 1900  |
| ffn-hidden-dim     | 1600  |
| ffn-num-layers     | 1     |
| dropout            | 0.0   |
| epochs             | 100   |

## CROSS-VALIDATION

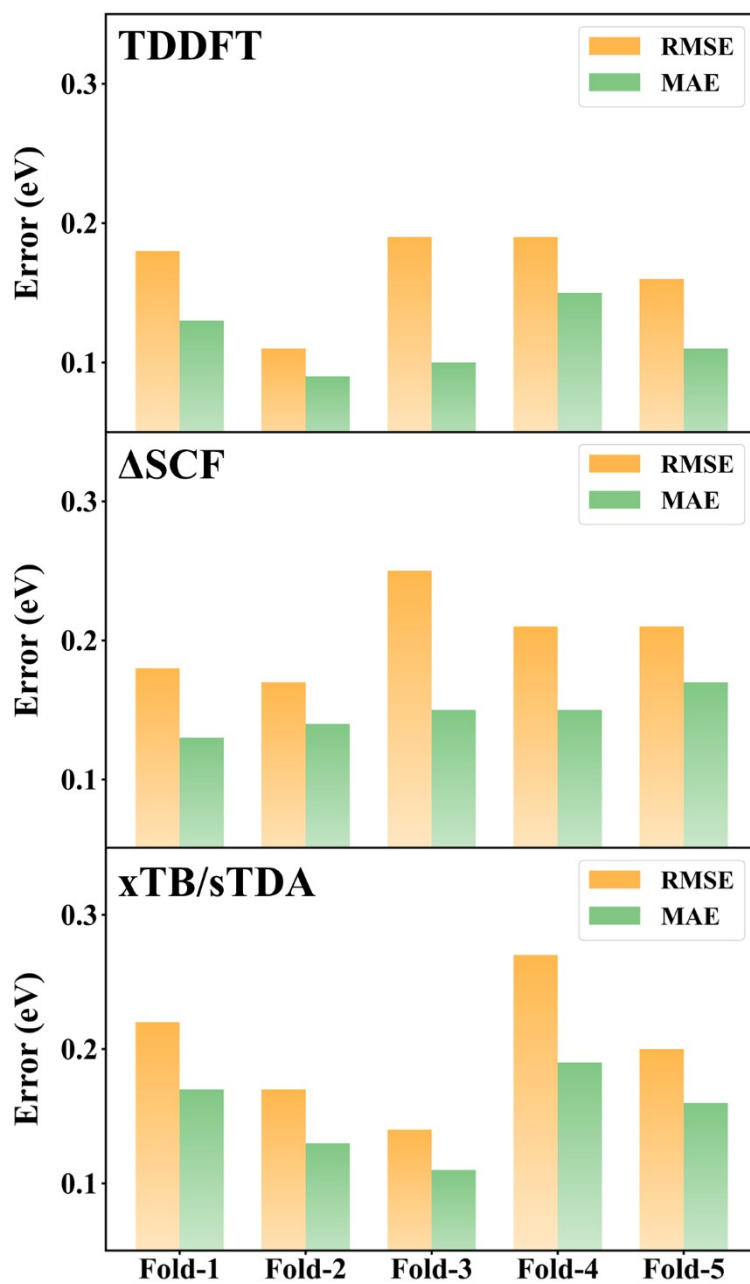

**Figure S2:** Computed five-fold cross-validation for the training dataset.

## LIST OF MOLECULES

**Table S5:** List of molecules in the test dataset that satisfied the stringent criteria of a pre-correction error  $|\Delta E| \geq 0.38$  eV, a post-correction error  $|\Delta E| \leq 0.10$  eV, and a minimum improvement of 50% across all three QM methods. The  $T_1$  excitation energies of all molecules are reported in eV.

## DATA AND CODE AVAILABILITY

All the training and test datasets, pre-trained models, and automated python scripts used in this study have been deposited in a GitHub repository to ensure reproducibility of the reported

| TDDFT                                                                               |            |              |                               |                          |                        |                 |
|-------------------------------------------------------------------------------------|------------|--------------|-------------------------------|--------------------------|------------------------|-----------------|
| Molecule                                                                            | Experiment | TDDFT        | TDDFT + $\Delta$ -MPNN        | Uncorrected $ \Delta E $ | Corrected $ \Delta E $ | Improvement (%) |
|    | 2.38       | 1.96         | 2.34                          | 0.42                     | 0.04                   | 90.48           |
| $\Delta$ SCF                                                                        |            |              |                               |                          |                        |                 |
| Molecule                                                                            | Experiment | $\Delta$ SCF | $\Delta$ SCF + $\Delta$ -MPNN | Uncorrected $ \Delta E $ | Corrected $ \Delta E $ | Improvement (%) |
|   | 2.31       | 2.73         | 2.27                          | 0.42                     | 0.04                   | 90.48           |
|  | 2.70       | 3.22         | 2.73                          | 0.52                     | 0.03                   | 94.23           |
|  | 1.54       | 1.91         | 1.49                          | 0.37                     | 0.05                   | 86.49           |
| xTB/sTDA                                                                            |            |              |                               |                          |                        |                 |
| Molecule                                                                            | Experiment | xTB/sTDA     | xTB/sTDA + $\Delta$ -MPNN     | Uncorrected $ \Delta E $ | Corrected $ \Delta E $ | Improvement (%) |
|  | 1.20       | 1.71         | 1.18                          | 0.51                     | 0.02                   | 96.08           |
|  | 2.70       | 3.69         | 2.64                          | 0.99                     | 0.06                   | 93.94           |
|  | 3.02       | 3.63         | 3.08                          | 0.61                     | 0.06                   | 90.16           |
|  | 1.54       | 2.21         | 1.56                          | 0.67                     | 0.02                   | 97.01           |
|  | 2.44       | 3.14         | 2.48                          | 0.70                     | 0.04                   | 94.28           |
|  | 3.04       | 3.78         | 3.10                          | 0.74                     | 0.06                   | 91.89           |

results.

GitHub link: <https://github.com/PyGhosh/Delta-MPNN>

**Table S6:**  $R^2$ , RMSE and MAE values of the 5 representative test molecules between experimental  $T_1$  values and TDDFT  $T_1$  values using different exchange-correlation functionals.

| <b>B3LYP</b>                      |                  |                 |
|-----------------------------------|------------------|-----------------|
| <b>TDDFT</b>                      |                  |                 |
| <b><math>R^2</math></b>           | <b>RMSE (eV)</b> | <b>MAE (eV)</b> |
| 0.86                              | 0.20             | 0.13            |
| <b>CAM-B3LYP</b>                  |                  |                 |
| <b>TDDFT</b>                      |                  |                 |
| <b><math>R^2</math></b>           | <b>RMSE (eV)</b> | <b>MAE (eV)</b> |
| 0.77                              | 0.25             | 0.22            |
| <b><math>\omega</math>-B97X-D</b> |                  |                 |
| <b>TDDFT</b>                      |                  |                 |
| <b><math>R^2</math></b>           | <b>RMSE (eV)</b> | <b>MAE (eV)</b> |
| 0.78                              | 0.25             | 0.21            |
